# Supplementary material
Source: PubMed Central journal article supplement (PMC1664973)
Supplement: TJP337figs1.pdf [file TJP337figs1.pdf]

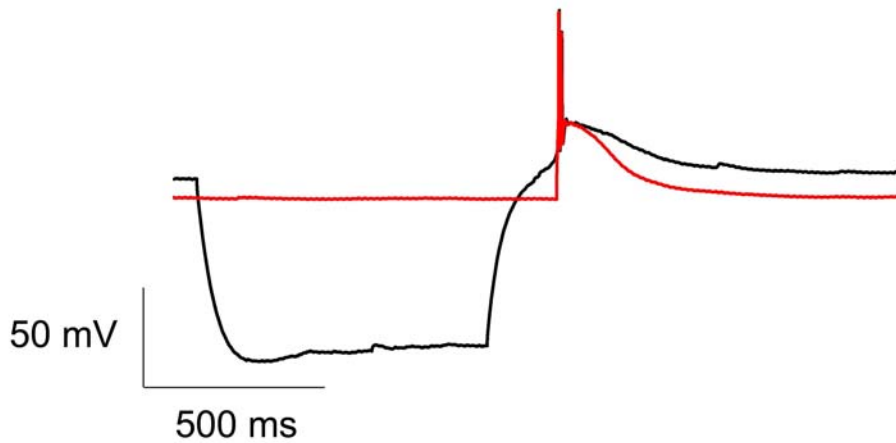

**Supplemental Data. Sustained hyperpolarization and brief depolarizations from hyperpolarized potentials trigger low threshold spikes.** (A) Voltage recordings from a single cell are overlay at identical time and voltage scales during sustained hyperpolarization (black trace) from -64 mV and during a 5 ms depolarizing current injection from -70 mV. Note that the prolonged afterdepolarization is present in both regimes.
